# Supplementary material for: Epidemiology of carbapenem-resistant Klebsiella pneumoniae bloodstream infections after renal transplantation from donation after cardiac death in a Chinese hospital: a case series analysis
Source: Antimicrob Resist Infect Control. 2018 May 21;7:66. doi: 10.1186/s13756-018-0355-8 (PMC5963103; doi:10.1186/s13756-018-0355-8)
Supplement: Supplementary file 1 — Table S1. Demographic characteristics and utilization of immunosuppression drugs of patients following renal transplantation. (XLSX 10 kb) [file 13756_2018_355_MOESM1_ESM.xlsx]

## Sheet: Sheet1
Table 1. Demographic characteristics and utilization of immunosuppression drugs of patients following renal transplantation
Varibles	Survivors (n=1)	Non-survivors (n=4)	Case 1	Case 2	Case 3	Case 4	Case 5
Ages (year), at transplantation, median (range)	51	47(44-54)	47	47	51	44	54
Male gender, n(%)	1(100)	2(50)	Male	Female	Male	Female	Male
CIT(hours), median(range)	7	2(2-6)	6	2	7	2	2
Immunosuppression
Calcineurin inhibitor
Cyclosporin, n(%)	1(100)	1(25)	No	No	Yes	Yes	No
Tacrolimus, n(%)	1(100)	4(100)	Yes	Yes	Yes	Yes	Yes
Adjuvant drug
MMF, n(%)	1(100)	4(100)	Yes	Yes	Yes	Yes	Yes
Prednisone, n(%)	1(100)	3(75)	No	Yes	Yes	Yes	Yes
Methylprednisolone, n(%)	0(0)	4(100)	Yes	Yes	No	Yes	Yes
Dexamethasone, n(%)	0(0)	2(50)	Yes	Yes	No	No	No
Monoclonal and polyclonal antibodies
ATG, n(%)	1(100)	1(25)	Yes	No	Yes	No	No
Basiliximab, n(%)	1(100)	4(100)	Yes	Yes	Yes	Yes	Yes
Etiology of CRF
SAH, n(%)	1(100)	4(100)	Yes	Yes	Yes	Yes	Yes
Diabetes, n(%)	0(0)	1(25)	No	No	No	No	Yes
GMN, n(%)	1(100)	1(25)	No	No	Yes	Yes	No
IgA nephropathy, n(%)	1(100)	1(25)	No	No	Yes	Yes	No
CCI, median(range)	3	4(3-6)	3	5	3	3	6
ATG=Anti-thymocyte globulin; CIT=cold ischemia time; CRF=Chronic renal failure; MMF=mycophenolate mofetil; SAH=systemic arterial hypertension; GMN=glomerulonephritis; CCI=charlson comorbidity Index
