# Supplementary material for: Epidemiology of carbapenem-resistant Klebsiella pneumoniae bloodstream infections after renal transplantation from donation after cardiac death in a Chinese hospital: a case series analysis
Source: Antimicrob Resist Infect Control. 2018 May 21;7:66. doi: 10.1186/s13756-018-0355-8 (PMC5963103; doi:10.1186/s13756-018-0355-8)
Supplement: Supplementary file 2 — Table S2. Summary of carbapenem-resistant Klebsiella pneumoniae (CR-KP) isolation site, episodes of sepsis, antibiotic treatments adopted, outcome, excision of transplanted kidney and cause of death. (XLSX 9 kb) [file 13756_2018_355_MOESM2_ESM.xlsx]

## Sheet: Sheet1
Table 2. Summary of carbapenem-resistant klebsiella pneumoniae (CR-KP) isolation site, episodes of sepsis, antibiotic treatments adopted, outcome, excision of transplanted kidney and cause of death
Case No.	Site of CRKP isolation	Sepsis	Antibiotic regimen at first BSI	Outcome	Excision of transplanted kidney	Cause of death
1	A,B,G,I,L,O,T,U	+	MEM+TGC	Died/graft loss	+	Septic shock
2	B,E,L,O,Ti	+	MEM+TGC +AMK+AMB+VOR	Died/graft loss	+	Septic shock
3	I,L,O,U	+	MEM+TGC	Survived/graft loss	+	-
4	O,U	+	MEM+TGC	Died/graft loss	+	Shock caused by rupture of renal artery
5	I,L,O,U	+	MEM+TGC	Died	-	Shock caused by rupture of renal artery
A: Abdominal cavity; AMB: Amphotericin B; AMK:Amikacin;B: Blood; E: External iliac artery; G: Gallbladder; I: Incision; L: Lung; MEM: Meropenem; O: Organ-space surgical site; T: Thoracic cavity; TGC: Tigecycline; Ti: Tip of catheter; U: Urinary tract; VOR: :Voriconazole; +: positive; -: negtive
